# Supplementary material for: In liver fibrosis, dendritic cells govern hepatic inflammation in mice via TNF-α
Source: JCI journal article supplement (doi:10.1172/jci37581), 2009-10-12
Supplement: sd1 [file 1]

301 Moved Permanently

# Moved Permanently

The document has moved here.
